# Supplementary material for: Activities Contributing to Total Energy Expenditure in the United States: Results from the NHAPS Study
Source: Springer Nature journal article supplement (doi:10.1186/1479-5868-1-4), 2004-02-12
Supplement: Additional file 1 [file 1479-5868-1-4-s1.doc]

**Appendix A. Full list5** ranking activities performed by subjects in the NHAPS study, 1992-1994

| **Rank** | **Activity Description** | **MET** | **Percent of**  **Total Score (%)** | **Cumulative Percentage (%)** | **Average Duration4 (min)** | **Number of Subjects** |
| --- | --- | --- | --- | --- | --- | --- |
| (1) | Sleeping, napping5 | 0.9 | (19.06) 5 | -- | 501 | 7493 |
| 1 | Driving car 1 | 2.3 | 10.90 | 10.90 | 101 | 6574 |
| 2 | Job: Office work, typing | 1.5 | 9.24 | 20.13 | 415 | 2094 |
| 3 | Watching TV/movie, home or theater | 1.0 | 8.65 | 28.78 | 216 | 5919 |
| 4 | Taking care of child/baby (feeding, bathing, dressing)2 | 3.0 | 8.38 | 37.16 | 60 | 6545 |
| 5 | Activities performed while sitting or lying quietly, little movement | 1.3 | 5.78 | 42.94 | 158 | 4086 |
| 6 | Eating (implied sitting) | 1.5 | 5.30 | 48.24 | 76 | 6843 |
| 7 | Cleaning house, general2 | 3.0 | 3.93 | 52.18 | 126 | 1489 |
| 8 | Talking/ Visiting, in person or on phone | 1.5 | 3.78 | 55.96 | 132 | 2858 |
| 9 | Job: Industrial plant/factory (e.g. assembly line) | 3.0 | 3.78 | 59.73 | 490 | 333 |
| 10 | Food preparation (cooking, baking, setting table, etc.)2 | 2.0 | 2.93 | 62.67 | 53 | 3996 |
| 11 | Job: Construction site | 5.5 | 2.76 | 65.43 | 500 | 119 |
| 12 | Job: Light intensity, stand/walking (e.g. hospital staff, real estate inspector) | 3.0 | 2.67 | 68.10 | 464 | 291 |
| 13 | Yardwork-general: mowing lawn, trimming hedges2 | 4.3 | 2.63 | 70.73 | 147 | 559 |
| 14 | Attending event (social) involving talking while sitting | 1.6 | 2.22 | 72.95 | 142 | 1499 |
| 15 | Shopping for non-foods (e.g. clothing) | 2.3 | 2.07 | 75.02 | 97 | 1408 |
| 16 | Job: Store clerk, bartender, hair stylist (light standing) | 2.0 | 1.83 | 76.85 | 429 | 289 |
| 17 | Job: Farm hand (chores: baling hay, cleaning barn) | 8.0 | 1.55 | 78.40 | 417 | 57 |
| 18 | Job: Restaurant staff (e.g. waiter, chef) | 3.0 | 1.48 | 79.87 | 433 | 129 |
| 19 | Job: Teaching class | 1.8 | 1.09 | 80.96 | 417 | 195 |
| 20 | Laundry2 | 2.2 | 1.07 | 82.03 | 83 | 863 |
| 21 | Walking, moderately, (e.g. doing errands, walking to school) | 2.8 | 1.03 | 83.06 | 79 | 716 |
| 22 | Fishing and Hunting3 | 3.3 | 0.93 | 83.99 | 294 | 103 |
| 23 | Cleaning kitchen (sweeping)2 | 3.3 | 0.88 | 84.87 | 54 | 689 |
| 24 | Shopping for food, putting groceries away2 | 2.4 | 0.86 | 85.73 | 47 | 1125 |
| 25 | Swimming, exercise3 | 7.0 | 0.83 | 86.56 | 121 | 96 |
| 26 | Job: Mechanic | 3.0 | 0.70 | 87.26 | 427 | 56 |
| 27 | Gardening: Weeding, landscaping, picking vegetables2 | 3.7 | 0.65 | 87.91 | 121 | 198 |
| 28 | Remodeling, repairing house, workshop,  concrete work2 | 3.6 | 0.61 | 88.52 | 222 | 123 |

| **Rank** | **Activity Description** | **MET** | **Percent of**  **Total Score (%)** | **Cumulative Percentage (%)** | **Average Duration4 (min)** | **Number of Subjects** |
| --- | --- | --- | --- | --- | --- | --- |
| 29 | Exercise, aerobics3 | 6.5 | 0.59 | 89.11 | 58 | 248 |
| 30 | Job: Driving (e.g. truck driver, bus driver, ambulance, tractor) | 2.7 | 0.58 | 89.69 | 354 | 88 |
| 31 | Dancing/ Heavy Partying (all styles) | 4.0 | 0.56 | 90.25 | 166 | 122 |
| 32 | Moving, packing items2 | 3.5 | 0.53 | 90.78 | 73 | 318 |
| 33 | Sports: Golf3 | 4.5 | 0.48 | 91.26 | 228 | 63 |
| 34 | Playing with children, baby2 | 2.8 | 0.47 | 91.73 | 107 | 173 |
| 35 | Household chores, light cleaning2 | 2.3 | 0.44 | 92.17 | 91 | 330 |
| 36 | Caring for another person2 | 4.0 | 0.43 | 92.59 | 89 | 162 |
| 37 | Home projects (sewing, wrapping presents, arts and crafts)2 | 1.5 | 0.42 | 93.01 | 172 | 259 |
| 38 | Exercise at gym (e.g. stairmaster, bike, treadmill) 3 | 7.2 | 0.40 | 93.42 | 85 | 103 |
| 39 | Yardwork-hard: chopping firewood, digging, shoveling snow)2 | 6.0 | 0.39 | 93.80 | 120 | 88 |
| 40 | Job: Feeding/ Working with livestock | 4.0 | 0.38 | 94.17 | 80 | 131 |
| 41 | Petcare: Walking, Playing, Cleaning, Feeding 2 | 2.7 | 0.35 | 94.53 | 39 | 576 |
| 42 | Car maintenance, repair2 | 3.3 | 0.35 | 94.88 | 169 | 91 |
| 43 | Washing dishes/loading dishwasher2 | 2.3 | 0.35 | 95.22 | 27 | 808 |
| 44 | Game, board or cards, bingo, crosswords | 1.5 | 0.32 | 95.55 | 150 | 223 |
| 45 | Painting walls2 | 4.5 | 0.27 | 95.82 | 229 | 36 |
| 46 | Playing outdoors with others3 | 4.0 | 0.26 | 96.08 | 116 | 57 |
| 47 | Working in garage, general maintenance on items2 | 3.0 | 0.20 | 96.28 | 145 | 52 |
| 48 | Sports: Basketball3 | 6.0 | 0.20 | 96.48 | 133 | 37 |
| 49 | Other moderate recreational sports3 | 6.6 | 0.18 | 96.65 | 118 | 22 |
| 50 | Bike riding3 | 8.0 | 0.17 | 96.83 | 95 | 31 |
| 51 | Job: Packing, moving boxes | 8.0 | 0.17 | 96.99 | 141 | 18 |
| 52 | Volunteer work, unspecified | 3.0 | 0.17 | 97.16 | 217 | 29 |
| 53 | Other light recreational sports3 | 3.5 | 0.15 | 97.31 | 122 | 54 |
| 54 | Personal grooming (e.g. shaving, showering, brushing teeth)/ Dressing (sit/stand) | 1.7 | 0.15 | 97.46 | 15 | 851 |
| 55 | Jogging, exercise3 | 7.0 | 0.14 | 97.60 | 53 | 57 |
| 56 | Other heavy sports/exercise3 | 9.7 | 0.14 | 97.74 | 131 | 14 |
| 57 | Running, exercise3 | 8.0 | 0.12 | 97.86 | 76 | 20 |
| 58 | Sports: Baseball/Softball3 | 5.0 | 0.12 | 97.97 | 133 | 22 |
| 59 | Sports: Bowling3 | 3.0 | 0.11 | 98.09 | 139 | 33 |
| 60 | Hiking, exercise3 | 6.0 | 0.11 | 98.20 | 214 | 14 |
| 61 | Car washing2 | 4.5 | 0.11 | 98.31 | 69 | 57 |
| 62 | Waiting, standing | 1.2 | 0.11 | 98.42 | 30 | 465 |
| 63 | Game, video or computer | 1.5 | 0.10 | 98.52 | 138 | 76 |

| **Rank** | **Activity Description** | **MET** | **Percent of**  **Total Score (%)** | **Cumulative Percentage (%)** | **Average Duration4 (min)** | **Number of Subjects** |
| --- | --- | --- | --- | --- | --- | --- |
| 64 | Ironing2 | 2.3 | 0.10 | 98.63 | 54 | 125 |
| 65 | Playing a musical instrument | 2.5 | 0.10 | 98.73 | 106 | 51 |
| 66 | Sports: Tennis3 | 7.0 | 0.10 | 98.84 | 122 | 23 |
| 67 | Sports: Darts, Billiards/ Pool3 | 2.5 | 0.10 | 98.93 | 165 | 29 |
| 68 | Job: Painting | 4.5 | 0.09 | 99.03 | 272 | 13 |
| 69 | Lawncare: Watering, seeding, fertilizing2 | 2.1 | 0.09 | 99.12 | 64 | 109 |
| 70 | Sports: Soccer3 | 7.0 | 0.09 | 99.21 | 115 | 12 |
| 71 | Carpentry work2 | 3.0 | 0.09 | 99.30 | 173 | 30 |
| 72 | Art and Theater: Directing, Acting, Painting, Drawing, Ceramics | 2.2 | 0.08 | 99.38 | 213 | 34 |
| 73 | Getting ready to leave (organizing) | 3.0 | 0.07 | 99.45 | 29 | 122 |
| 74 | Electrical Work2 | 3.0 | 0.07 | 99.51 | 79 | 32 |
| 75 | Job: High intensity, implied manual work (e.g. firefighter, oil well work) | 10.5 | 0.06 | 99.58 | 83 | 10 |
| 76 | Cleaning outside/ basement, heavy2 | 3.0 | 0.06 | 99.64 | 125 | 29 |
| 77 | Plumbing2 | 3.0 | 0.06 | 99.69 | 204 | 18 |
| 78 | Exercise, weight lifting3 | 6.0 | 0.05 | 99.75 | 72 | 21 |
| 79 | Job: Daycare | 3.0 | 0.05 | 99.80 | 249 | 12 |
| 80 | Walking, exercise3 | 4.0 | 0.05 | 99.85 | 48 | 38 |
| 81 | Yoga, Physical therapy3 | 2.5 | 0.04 | 99.89 | 82 | 23 |
| 82 | Choir Rehearsal, singing | 2.0 | 0.03 | 99.92 | 95 | 20 |
| 83 | Moving large items (furniture)2 | 6.0 | 0.02 | 99.94 | 86 | 10 |
| 84 | Sexual activity | 1.3 | 0.02 | 99.96 | 93 | 31 |
| 85 | Pumping gas | 2.0 | 0.02 | 99.97 | 11 | 134 |
| 86 | Flying airplane | 2.0 | 0.01 | 99.99 | 236 | 5 |
| 87 | Lighting fire, furnace2 | 2.5 | 0.01 | 100.00 | 24 | 39 |

1Driving car includes 4 mentions of riding a motorcycle. As the Compendium does not establish a substantially different MET value (2.5) for riding a motorcycle than a car (2.0), they were combined into one category and the MET value was established as an average of the two values (2.3). This MET value did not change the list in any way. 2Household-related activities. 3Leisure-time physical activities. 4Average duration calculated using respective number of individuals mentioning that activity. 5 National Human Activity Pattern Survey (NHAPS). Percent scores for Sleeping/napping calculated as percent of all activities; percent scores for all other activities calculated as percent of all activities exclusive of Sleeping/napping.
